# Supplementary material
Source: PubMed Central journal article supplement (PMC3993966)
Supplement: pr401280w_si_001.pdf [file pr401280w_si_001.pdf]

# Supporting Information

## The Discovery of Human sORF-Encoded Polypeptides (SEPs) in Cell Lines and Tissue

*Jiao Ma<sup>1</sup>, Carl Ward<sup>1</sup>, Irwin Jungreis<sup>3,4</sup>, Sarah Slavoff<sup>1</sup>, Adam Schwaid<sup>1</sup>, John Neveu<sup>2</sup>,  
Bogdan A. Budnik<sup>2</sup>, Manolis Kellis<sup>3,4</sup> and Alan Saghatelian<sup>1</sup>*

1 Department of Chemistry and Chemical Biology, Harvard University, 12 Oxford Street,  
Cambridge, Massachusetts 02138, USA

2 MSPRL, Center for Systems Biology, Harvard University, 52 Oxford Street,  
Cambridge, Massachusetts 02138, USA

3 MIT Computer Science and Artificial Intelligence Laboratory, Massachusetts Institute  
of Technology, Cambridge, Massachusetts 02139, USA

4 The Broad Institute of MIT and Harvard, Cambridge, Massachusetts 02139, USA

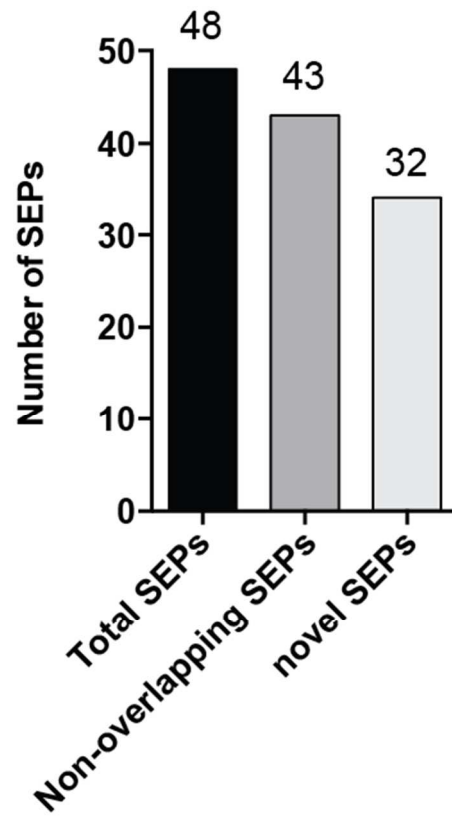

**Supplementary Figure 1.** Total number of SEPs detected in K562 cells using PAGE + LC-MS/MS workflow after performing an additional six technical replicates.



**Supplementary Figure 2. Alignment for ASNSD1-SEP shows protein-coding signature.**

Alignment for ASNSD1-SEP across 29 eutherian mammals, color-coded by CodAlignView ("CodAlignView: a tool for visualizing protein-coding constraint", I Jungreis, M Lin, M Kellis, in preparation). The amino acid sequences of the four tryptic peptides detected, NILDELKK, IVVDELSNLKK, QQQNSNIFFLADR, and EYQEIENLDKTK, are highlighted in yellow. The high concentrations of synonymous substitutions (light green) and conservative amino acid changes (dark green), and relatively low concentrations of radical amino acid changes (red) and frame-shifted regions (orange) is characteristic of protein-coding regions. The region's evolutionary coding potential as measured by per-codon PhyloCSF score, 4.315, is higher than 99.97% of non-coding regions, implying that it has been functional at the amino acid level in much of the eutherian mammal tree.

RHDAETKEAESSPATDTAAAPAAR, sf: .94, PRR3-SEP

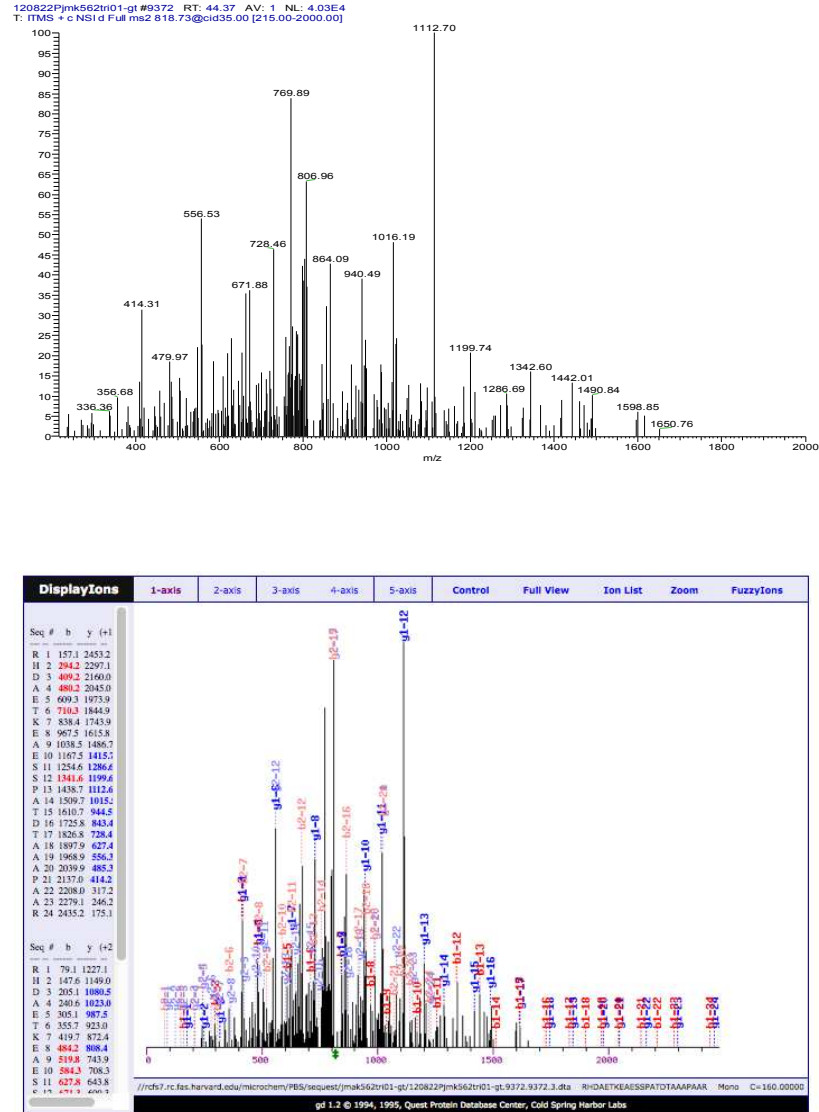

**Supplementary Figure 3.** MS/MS spectra (raw spectrum: top, SEQUEST annotated spectrum: bottom) for the detected peptide: RHDAETKEAESSPATDTAAAPAAR for PRR3-SEP, with SF score of 0.94.

A

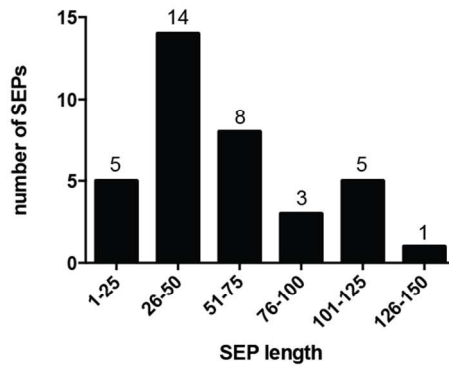

B

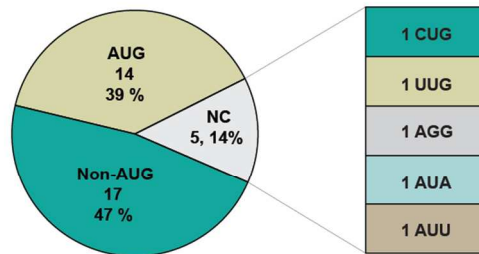

C

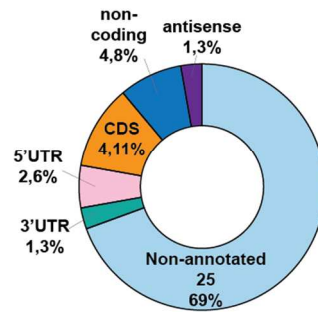

Supplementary Figure 4. **The characteristics of the 36 SEPs in K562 cells validated by Skyline-MRM.** (A) The length distribution of the SEPs, (B) the start codon usage of the SEPs, (C) the SEPs mRNA annotation by RefSeq.

A

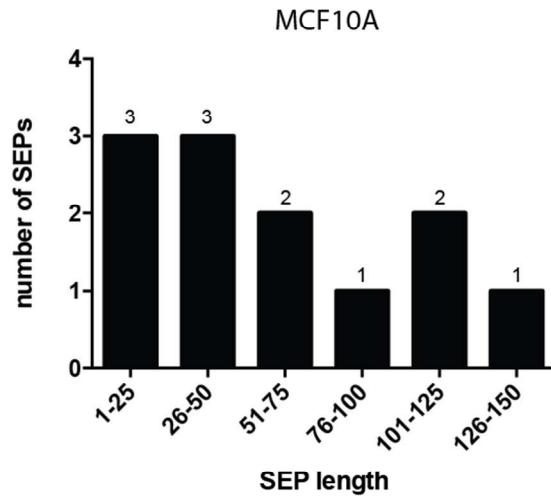

D

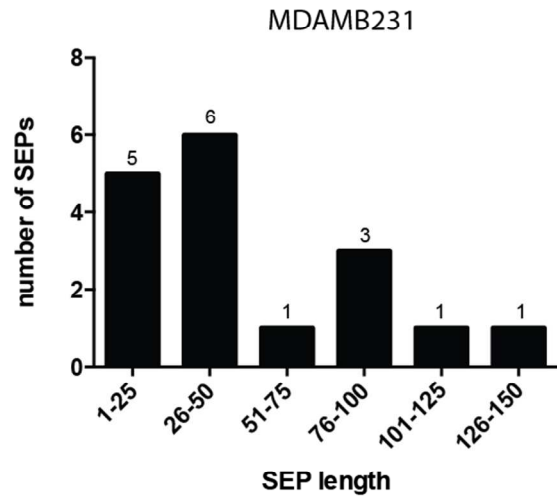

B

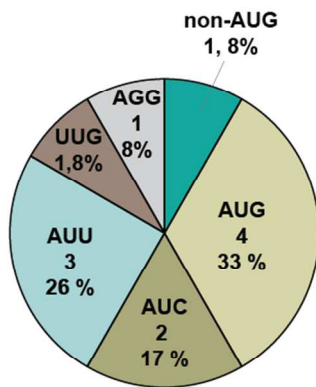

E

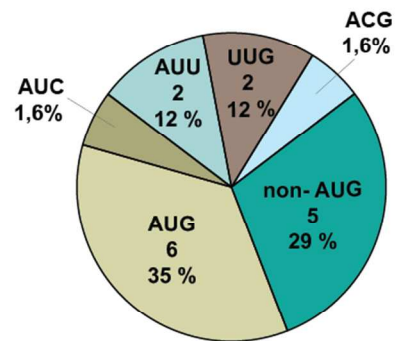

C

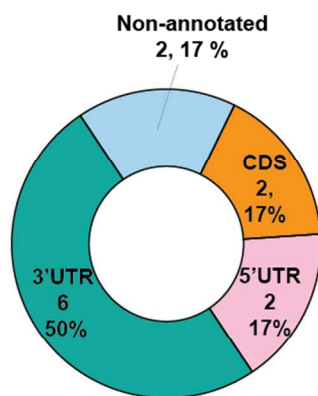

F

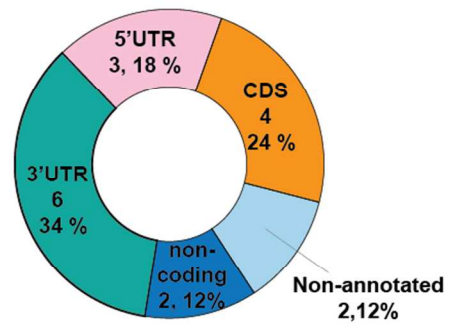

**Supplementary Figure 5. The characteristics of SEPs detected in MCF10A and MDAMB231 cell lines.** (A) The length distribution of the SEPs, (B) the start codon usage of the SEPs, (C) the SEPs mRNA annotation by RefSeq in MCF10A cells. Similarly (D) The length distribution of the SEPs, (E) the start codon usage of the SEPs, (F) the SEPs mRNA annotation by RefSeq in MDAMB231 cells.



Supplementary Table 1. **A list of 36 SEPs detected in K562 cells that were validated by Skyline-MRM.** The peptides detected by shotgun proteomics were shown in blue, the additional peptides validated in Skyline-MRM were shown in red, the overlapping peptides detected in both shotgun method and Skyline-MRM were highlighted in purple.

| Detected peptide by shotgun                       | Detected peptide by Skyline-MRM | Predicted SEP length | SEP sequence                                                                                                                                            |
|---------------------------------------------------|---------------------------------|----------------------|---------------------------------------------------------------------------------------------------------------------------------------------------------|
| IVYGDIRK<br><br>KIVYGDIR                          | IVYGDIR                         | 41                   | LYQRREELKLQWRSFNLDKIV<br>YGDIRKEGILNALETMGSSF                                                                                                           |
| ADAPAVSPESPQK                                     | KPPFQPR<br>ADAPAVSPESPQK        | 101                  | MSRGGQFGQGQEPLDMFFWV<br>NEISGEITYPPQKADAPAVSPE<br>SPQKPPFQPRSVQEAPCSPQ<br>GPPAQRPALAPPSKPSLKDSG<br>SRNPCPSAPTWARPKPEE                                   |
| KNFFISK                                           | ALAYIGAR                        | 20                   | MPKNFFISKIKALAYIGARC                                                                                                                                    |
| EAESSPATDTAAAPAAR<br>RHDAETKEAESSPATDTAAA<br>PAAR | APSSLPSK<br>EAESSPATDTAAAPAAR   | 93                   | MPGRDGGRLAPECGRRRCS<br>PQPSGSGMAGASALLPTDPP<br>EAETESPRAPSSLPSKSRCSHC<br>RRHDAETKEAESSPATDTAAA<br>PAARAGR DWR                                           |
| FSPLELAAGGVR                                      | FSPLELAAGGVR<br>LLLPCPCCFG      | 127                  | MAGGDPAAGRAVGAAKAKR<br>AAGICGDTAAPALSGHPPDCL<br>PESPGRGGLTCSPSQSRFSPLE<br>LAAGGVRGCGAQLVTVGCSE<br>PSWSPGEGAGPGEQQSLDVE<br>AAEALQAGPASPRCRLLLPCP<br>CCFG |
| YLDLHER                                           | QIFHSNK                         | 33                   | IRKYLDLHERQIFHSNKHLLNII<br>NCKAQTTRVK                                                                                                                   |
| QGSLVQQVALR                                       | EVLEQLMK                        | 66                   | MMKNQWMEIGHHQLHQPS<br>RFLHLKHPEILPTVQGSLVQQ<br>VALRLEVLLRKEVLEQLMKMIL                                                                                   |
| RNLVVVINL                                         | DPMNAK<br>TLEVVIS               | 71                   | MNVRNVRNLVVVINLFYITG<br>FMSLRDPMNAKSVGRTFVVA<br>INLLYIKDFILVRNPMNVQNV<br>GRTLEVVIS                                                                      |

|                                                                     |                                                   |     |                                                                                                                                                                    |
|---------------------------------------------------------------------|---------------------------------------------------|-----|--------------------------------------------------------------------------------------------------------------------------------------------------------------------|
| IYNRLYFLEK                                                          | VNFCNK                                            | 24  | VNFCNKASWDLK <b>KIYNRLYFL</b><br>EKF                                                                                                                               |
| EGGWRQVEGTGTPK                                                      | DSAKPIR<br>QVEGTGTPK                              | 75  | MTTGER <b>DSAKPIR</b> ATATRQED<br>RSP <b>EGGWRQVEGTGTPK</b> SKQ<br>GSRVLAAQEETQHPEAVPQR<br>ADPKGASASPLRRQ                                                          |
| ELSQYLK                                                             | MDELSQYLK                                         | 42  | <b>MDELSQYLK</b> VILPSTVVLDVILL<br>QLSFLLYIANFLFSLGSLP                                                                                                             |
| SRQVDQEVRSR                                                         | QVDQEV                                            | 24  | SQHFG <b>SRQVDQEVRSR</b> TA<br>WPRW                                                                                                                                |
| ENIPDITK                                                            | DFVFNLSK                                          | 32  | <b>DFVFNLSK</b> ILVENRPAFVNEN<br>IPDITKPKHF                                                                                                                        |
| VAEIIER                                                             | TLYTCLR<br>LVSHGINLALIFSIWK                       | 116 | <b>RVAEIIERLVSHGINLALIFSIW</b><br><b>K</b> CLKENHFHCRKSFFKYLPR<br>EISLYLPPQAVISCFREWNPPC<br>PSIFWFLGLNSSLVKSPWLGIL<br>SWEQILSCSLMCLHSP <b>TLYTC</b><br><b>LLRA</b> |
| AIVVARVVTIPK                                                        | MVAIVVAR                                          | 43  | <b>MVAIVVARVVTIPK</b> IMHQPVL<br>SFLNFHVPLYTFMSVYVDLSLV                                                                                                            |
| GDFLNLR                                                             | <b>AGDFLNLR</b>                                   | 41  | <b>AGDFLNLRIGISYQFCK</b> FSPINY<br>FFFLFSPCLLYGILLDIS                                                                                                              |
| AGDFLNLR                                                            | IGISYQFCK                                         |     |                                                                                                                                                                    |
| GFLAGYVVAK<br>TLRDYLQLLR<br>NQLESLQR<br>RVEDEVNSGVGQDGSLLSSP<br>FLK | <b>NQLESLQR</b><br>NQLESLQRR<br><b>GFLAGYVVAK</b> | 103 | MADDKDSLPLKDLAFL <b>KNQL</b><br><b>ESLQRRVEDEVNSGVGQDGS</b><br><b>LLSSPFLKGFLAGYVVAK</b> LRAS<br>AVLGFVAVGTCTGIYAAQAYAV<br>PNVEK <b>TLRDYLQLLR</b> KGPD            |
| RLLFAGK<br>IRLLFAGK                                                 | GTTFSWVIR                                         | 22  | <b>GTTFSWVIR</b> LLFAGKLNYS<br>S                                                                                                                                   |

|              |                                                                     |     |                                                                                                                                      |
|--------------|---------------------------------------------------------------------|-----|--------------------------------------------------------------------------------------------------------------------------------------|
| GLIENPALIR   | LMQEGK<br>QGLIENPALIR                                               | 100 | QRVQAERLAIRARLKREYLLQY<br>NDPNRQGLIENPALIRWAYAR<br>TTNVYPNFRPTPKNSLMGALC<br>GFGPLIFIYYIIKTERDRKEKLM<br>QEGKLDRTVHLSY                 |
| QNIKGLENILQK | GLENILQK<br>VVTTLQSSSENQR                                           | 81  | IWSRVVTLTLQSSSENQRQNIK<br>GLENILQKEAATCVDNGLFMP<br>LLSVDLVQETCSGDGCEGG<br>MRIDIDTPVSQTCLFITLL                                        |
| SWLTPVAGK    | MAPLGLK                                                             | 26  | MAPLGLKDPLSSWLTPVAGKL<br>VMAVS                                                                                                       |
| HALPLLK      | QEFHALPLLK<br>NSTNFFLLIK                                            | 52  | NSTNFFLLIKQRSFGGFIPIADK<br>RGKDGKCSRFLSFHKQEFHAL<br>PLLKQRKE                                                                         |
| GAGILLR      | TGAGILLR                                                            | 44  | TGAGILLRWLTHWLLAGSLR<br>SSPGVPLHVLLHGLMMWHEP<br>HSV                                                                                  |
| KQNSLIANMEK  | SGYINR<br>SCLHSIK<br>GEEAAEEK<br>MQIEATR<br>GQTLFSSTK<br>QNSLIANMEK | 114 | LIKQNSLIANMEKVLVWVM<br>EDQTSJNIPLSQSLIQSKGQTL<br>FSSTKNEKGEEAAEEKFEASRV<br>WLMRFKERSCLSIKMQIEAT<br>RADEEGTASDPEDPAKLIDKS<br>GYINRFTM |
| MKNFLAVTITGK | TSVQGITTVILK                                                        | 110 | IDWRRKRRKKIEKRKSFRAEV<br>NTKNISPLPHLPPPPPLLLRL<br>QKAVVRVRVTIKKKYKGRKE<br>RKTSVQGITTVILKRRSLRRES                                     |

|                |                                         |    |                                                                             |
|----------------|-----------------------------------------|----|-----------------------------------------------------------------------------|
|                |                                         |    | FMKNFLAVTITGKPRKSPGS                                                        |
| KDLHLSWEPK     | FEFFPK<br>NGLPSVLLVK                    | 43 | KQQPPLFSLYKFEFFPKLDLH<br>LSWEPKEKNGLPSVLLVKEIL                              |
| KNEFLK         | DHVLFFK                                 | 27 | IIFKNEFLKDHVLFFKSIFSSYF<br>CYC                                              |
| AEIILK         | VFDLQDF<br>MAEIIILK                     | 17 | MAEIIILKAKVFDLQDF                                                           |
| TPLLAYIQ       | TPLLAYIQPDTSAF                          | 49 | MNLEMEKKAGLFQRVDLSEL<br>DSTIELCCIFCGSSKTPLLAYIQP<br>DTSAF                   |
| HAFLNLR        | HALFLNLR<br>NLQTPGAVGEDK                | 54 | HAFLNLRRAIPSPQSNLNERPQ<br>VQLLHSPDLLSTPRNLQTPG<br>AVGEDKKGSGVA              |
| EVEGAVSR       | QSEVMSQK<br>IFNNHTLIK                   | 42 | TQVEGAVSRDCITALQPGKQ<br>SEVMSQKQTTKIFNNHTLIK                                |
| RKPLYTIGWNL    | DFTSHQLER                               | 64 | SSGKGKNSQRDFTSHQLERL<br>SSKRQNIKRVGKNAEKRKPLY<br>TIGWNLNWYSHYKKQHGGSS<br>KN |
| KINALLK        | GNILLSNK                                | 50 | SQPPLKCLCIKINALLKGNILLS<br>NKCVCVYHTSILRKCWTSEY<br>HKTGN                    |
| FQPPHHVQSSPDVK | GLSFQPPHHVQSSPDVK                       | 32 | ESCEPTEQKGLSFQPPHHVQ<br>SSPDVKSQFWF                                         |
| ARDQYGHLIPTK   | KPSFSPR<br>DQYGHLIPTK<br>GSCHFLSQVGGWGI | 61 | MCAEIEEGAEGVTARDQYGH<br>LIPTKVASGPQGLSGARKPSFP<br>SPRLRGSCHFLSQVGGWGI       |
| LAFIFLPDR      | NDLAFIFLPDR                             | 65 | AKIVPLHSSLGDRVRPCLKTKQ<br>TKEFRNDLAFIFLPDRQCIHQD<br>GTLTGNQVLAPLLAGKEHEVF   |

Supplementary Table 2. A list of all novel SEPs detected in this study.
